# Supplementary material for: An intervention to optimise coach-created motivational climates and reduce athlete willingness to dope (CoachMADE): a three-country cluster randomised controlled trial
Source: PubMed Central journal article supplement — Br J Sports Med. 2020 Sep 11;55(4):213–9. doi: 10.1136/bjsports-2019-101963 (PMC7873414; doi:10.1136/bjsports-2019-101963), 2020-09-11
Supplement: bjsports-2019-101963supp001.pdf [file bjsports-2019-101963supp001.pdf]

CoachMADE outcomes 1

## Supplementary Material

### **An Intervention to Optimize Coach-Created Motivational Climates and Reduce Athlete Willingness to Dope (CoachMADE): Outcomes of a Multi-Country Cluster Randomised Controlled Trial**

## CoachMADE outcomes 2

Table S1. Adjusted differences between experimental groups on athlete reported outcomes for intention-to-treat and per protocol analyses.

| Outcome                               | Post-intervention (3 months) |                   | Long-term Follow-up (6 months) |                   |
|---------------------------------------|------------------------------|-------------------|--------------------------------|-------------------|
|                                       | UKref                        | GRCref            | UKref                          | GRCref            |
| ITT                                   |                              |                   |                                |                   |
| <u>All Cases Analysis</u>             | .16 (-.01, .32)              | -.07 (-.23, .09)  | -.02 (-.18, .14)               | -.03 (-.22, .16)  |
| Doping willingness                    | .07 (-.10, .23)              | -.11 (-.27, .04)  | .05 (-.10, .20)                | -.05 (-.23, .13)  |
| Doping moral disengagement            | .07 (-.10, .23)              | -.08 (-.23, .08)  | .02 (-.18, .20)                | -.07 (-.28, .15)  |
| Doping attitudes                      | -.34 (-.78, .12)             | -.46 (-.86, -.05) | .17 (-.32, .67)                | .06 (-.51, .65)   |
| Doping efficacy                       | .16 (-.09, .42)              | .31 (.06, .55)    | .00 (-.27, .27)                | .24 (-.08, .55)   |
| Behaviours against inadvertent doping | .33 (.02, .63)               | .07 (-.21, .35)   | .42 (.08, .78)                 | .41 (.02, .80)    |
| Anti-doping knowledge                 |                              |                   |                                |                   |
| Perceived coach need support          | .12 (-.10, .34)              | .40 (.20, .60)    | .10 (-.13, .33)                | -.13 (-.41, .14)  |
| Perceived coach need thwarting        | .06 (-.16, .29)              | -.48 (-.69, -.28) | .11 (-.12, .33)                | -.01 (-.27, .25)  |
| Need satisfaction                     | .04 (-.15, .23)              | .12 (-.06, .31)   | .09 (-.12, .30)                | -.19 (-.45, .06)  |
| Need frustration                      | -.07 (-.29, .15)             | -.26 (-.46, -.06) | .05 (-.18, .28)                | -.05 (-.32, .22)  |
| <u>Sensitivity Analysis</u>           |                              |                   |                                |                   |
| Doping willingness                    | .27 (.06, .48)               | -.03 (-.22, .16)  | -.03 (-.25, .18)               | -.01 (-.20, .19)  |
| Doping moral disengagement            | .09 (-.10, .28)              | -.14 (-.31, .03)  | -.04 (-.26, .17)               | -.04 (-.22, .15)  |
| Doping attitudes                      | .16 (-.04, .36)              | -.11 (-.28, .07)  | -.16 (-.43, .11)               | -.07 (-.30, .17)  |
| Doping efficacy                       | .04 (-.51, .60)              | -.19 (-.68, .29)  | .04 (-.69, .75)                | -.12 (-.76, .52)  |
| Behaviours against inadvertent doping | .11 (-.23, .44)              | .33 (.03, .64)    | .10 (-.29, .48)                | .22 (-.12, .56)   |
| Anti-doping knowledge                 | .32 (-.09, .73)              | -.02 (-.38, .35)  | .31 (-.17, .77)                | .46 (.04, .89)    |
| Perceived coach need support          | .09 (-.18, .38)              | .45 (.21, .70)    | -.02 (-.35, .30)               | -.08 (-.37, .21)  |
| Perceived coach need thwarting        | -.07 (-.36, .23)             | -.64 (-.90, -.38) | .08 (-.22, .38)                | .09 (-.18, .35)   |
| Need satisfaction                     | .04 (-.21, .29)              | .25 (.02, .49)    | -.10 (-.41, .20)               | -.32 (-.60, -.04) |
| Need frustration                      | -.19 (-.46, .08)             | -.34 (-.58, -.11) | -.15 (-.47, .17)               | .00 (-.28, .29)   |

*Note:* We created two dummy variables to represent the Greek (GRCref = .67, UK/AUS = -.33) or British (UKref = .67, GRC/AUS = -.33) athletes as the reference group. With this effect coding, the dummy coefficient represents the difference between the Greek sample (or the British sample) from the average of all three countries on the dependent variable; grey shade = credibility interval excludes zero.

## CoachMADE outcomes 3

Table S2. Adjusted differences between experimental groups on coach reported outcomes for intention-to-treat and per protocol analyses.

| Outcome                                          | Post-intervention (3 months) |                      | Long-term Follow-up (6 months) |                     |
|--------------------------------------------------|------------------------------|----------------------|--------------------------------|---------------------|
|                                                  | UKref                        | GRCref               | UKref                          | GRCref              |
| <u>All Cases Analysis</u>                        |                              |                      |                                |                     |
| Doping moral disengagement                       | -.11 (-.44, .22)             | -.14 (-.49, .22)     | .23 (-.11, .57)                | .10 (-.27, .47)     |
| Doping attitudes                                 | .10 (-.02, .22)              | -.07 (-.20, .06)     | .07 (-.08, .21)                | .04 (-.12, .21)     |
| Efficacy to discuss doping issues                | -2.20 (-8.48, 4.14)          | -3.72 (-10.49, 3.02) | -1.93 (-7.43, 3.59)            | -1.37 (-7.31, 4.57) |
| Efficacy to create anti-doping culture           | .53 (-3.91, 4.98)            | .68 (-4.22, 5.55)    | .25 (-4.40, 4.63)              | -3.47 (-8.26, 1.42) |
| Encourage athletes to prevent inadvertent doping | .16 (-.82, 1.14)             | .09 (-.99, 1.16)     | -.31 (-1.37, .73)              | -.56 (-1.73, .60)   |
| Anti-doping knowledge                            | .38 (-.09, .86)              | -.68 (-1.18, -.18)   | -.68 (-1.16, -.21)             | .53 (.02, 1.04)     |
| Perceived effectiveness of need support          | -.05 (-.41, .31)             | .10 (-.31, .51)      | -.01 (-.47, .45)               | -.16 (-.68, .37)    |
| Perceived effectiveness of need thwarting        | -.45 (-.91, .02)             | -.23 (-.73, .27)     | .41 (-.13, .94)                | .78 (.19, 1.38)     |
| <u>Sensitivity Analysis</u>                      |                              |                      |                                |                     |
| Doping moral disengagement                       | .02 (-.26, .32)              | .10 (-.21, .42)      | -.26 (-.72, .20)               | -.32 (-.82, .18)    |
| Doping attitudes                                 | -.02 (-.26, .22)             | -.02 (-.28, .24)     | .02 (-.17, .21)                | -.10 (-.30, .11)    |
| Efficacy to discuss doping issues                | -4.89 (-12.63, 2.89)         | 1.12 (-7.41, 9.66)   | 5.47 (-3.40, 14.32)            | -.21 (-9.96, 9.54)  |
| Efficacy to create anti-doping culture           | -6.83 (-14.02, .40)          | -7.60 (-15.65, .55)  | 5.77 (-1.45, 13.00)            | 8.34 (.23, 16.43)   |
| Encourage athletes to prevent inadvertent doping | .14 (-.75, 1.03)             | .71 (-.28, 1.71)     | -.24 (-1.39, .90)              | -.63 (-1.90, .64)   |
| Anti-doping knowledge                            | .86 (.23, 1.40)              | -.29 (-.89, .31)     | -.32 (-1.07, .42)              | -.16 (-.98, .66)    |
| Perceived effectiveness of need support          | .23 (-.25, .72)              | -.63 (-1.17, -.08)   | -.14 (-.71, .43)               | .74 (.11, 1.38)     |
| Perceived effectiveness of need thwarting        | -.02 (-.52, .48)             | -.38 (-.94, .18)     | -.46 (-1.01, .09)              | -.23 (-.84, .39)    |

*Note:* We created two dummy variables to represent the Greek (GRCref = .67, UK/AUS = -.33) or British (UKref = .67, GRC/AUS = -.33) coaches as the reference group. With this effect coding, the dummy coefficient represents the difference between the Greek sample (or the British sample) from the average of all three countries on the dependent variable; grey shade = credibility interval excludes zero.

## CoachMADE outcomes 4

Figure S1. Visual depictions of statistically meaningful interaction effects for athlete reports in all cases analysis.

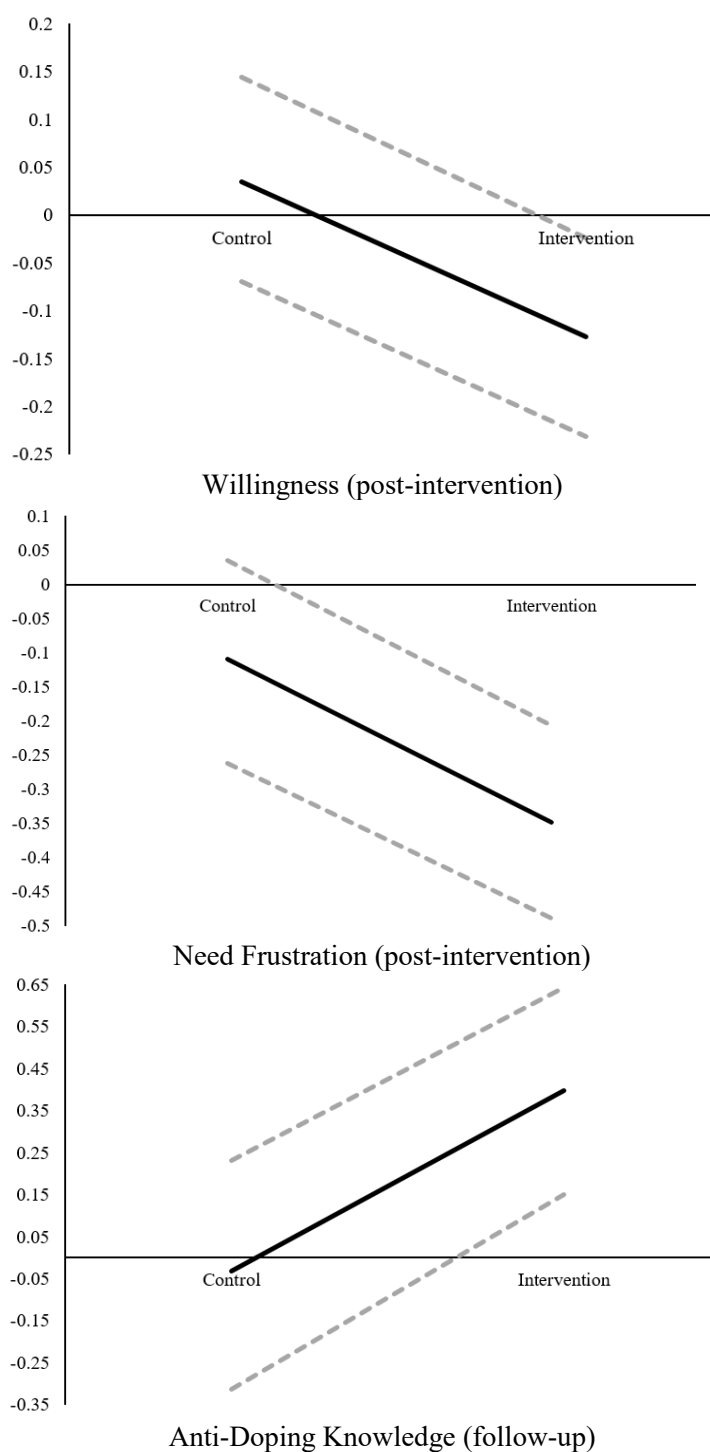

Note: grey dotted lines = 95% confidence interval of simple slope; figure depicts the amount of change for each group, adjusted for all of the covariates included in the analysis (e.g., the change in willingness from baseline to post-intervention was different from zero for the intervention group but not the control group).

## CoachMADE outcomes 5

Figure S2. Visual depictions of statistically meaningful interaction effects for coach reports in all cases analysis.

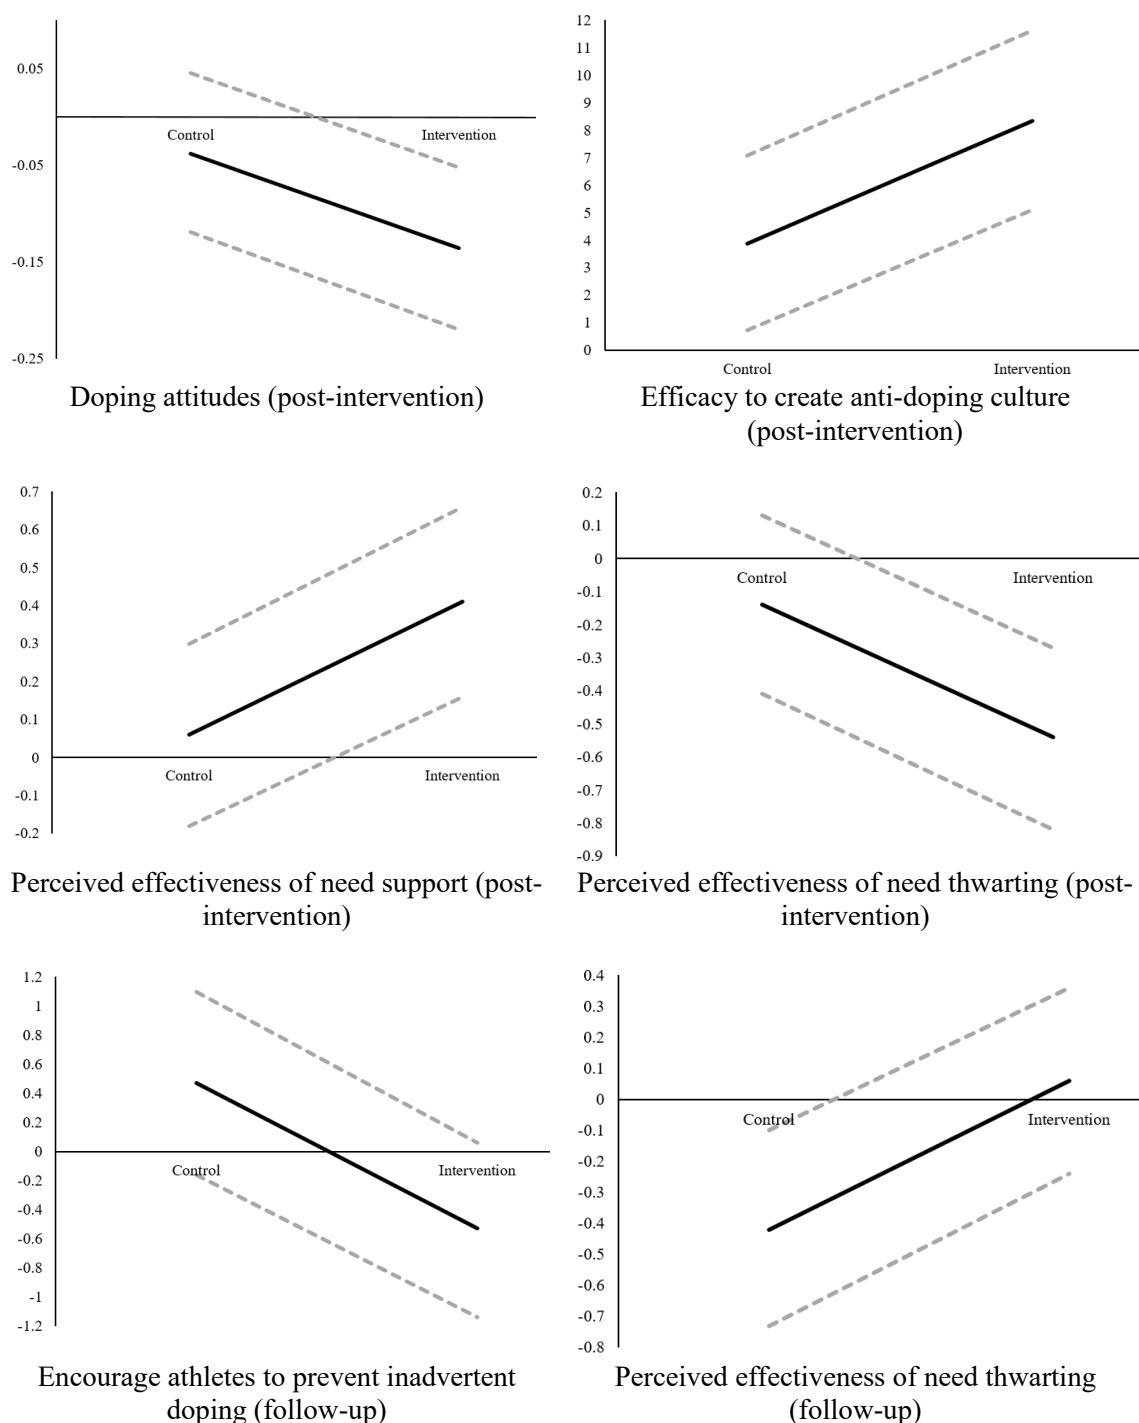

Note: grey dotted lines = 95% confidence interval of simple slope; figure depicts the amount of change for each group, adjusted for all of the covariates included in the analysis (e.g., the change in doping attitudes from baseline to post-intervention was different from zero for the intervention group but not the control group).
